# Supplementary material for: Inhibition of tyrosine kinase Fgr prevents radiation-induced pulmonary fibrosis (RIPF)
Source: PubMed Central journal article supplement (PMC10352363; doi:10.1038/s41420-023-01538-3), 2023-07-17

**Supplemental Figure 1: Induction of gene transcripts shown by heatmap and by analysis of enrichment analyses of chemokine genes from RNAseq in irradiated senescent cells.** (A) Heatmap showing chemokine genes in our RNAseq experiment [13] performed from FACS isolated irradiated (5 Gy, 10 days) senescent, irradiated non-senescent and non-irradiated cells in triplicate, from left to right. Heatmap showing top 10 chemokine genes are induced in irradiated senescent cells relative to irradiated non-senescent and non-irradiated cells. 4 genes were upregulated both in irradiated senescent and irradiated non-senescent cells compared to non-irradiated cells. (B) GO Enrichment analysis showing chemokine genes were enriched in irradiated senescent cells relative to irradiated non-senescent cells and (C) irradiated non-senescent cells and non-irradiated cells.

**Supplemental Figure 2. Fgr inhibitor TL02-59 reduces chemokines in SASP from irradiated senescent cells *in vitro*.** tdTOMP16+ bone marrow stromal cells were irradiated (5 Gy) and after 10 days tdTOM+ red senescent cells and tdTOM- non-red non-senescent were FACS purified and cultured with or without TL02-59 (10 nM) for 72 hours. Using chemokine array relative amounts of chemokines secreted in the media was measured. (n=2, \*, p<0.05, p values were calculated using unpaired t-test.

**Supplemental Figure 3. Radiation-induced senescence in explanted primary lung fibroblasts.** (A) primary fibroblasts were isolated and established from C57BL/6 lungs, irradiated (5 Gy) on culture plates at 50% confluency and 10 days later the cells were stained for senescence using SA-beta-Gal staining kit. (B) The number of blue

senescent cells were counted from 3 individual wells and 12% of all cells were senescent at day 10. (n=3, P values were calculated by non-parametric t-test. **(C)** The fibroblasts were stained with phalloidin (FITC) to confirm the presence of actin stress fiber.

**Supplemental Figure 4: Detection of Fgr in human fibrotic lungs.** Single-cell data from the published IPF atlas was analyzed for Fgr expression, **(A)** In interstitial lung disease patients (ILD) Fgr expression was significantly higher compared to donor controls in monocytes, dendritic cells and mast cells. **(B)** In idiopathic lung disease (ILD) Fgr expression was also significantly higher compared to donor controls in monocytes, macrophages, and dendritic cells **(C)** Surgically resected human RLPF lungs and control non-fibrotic donor lungs were sectioned (4uM) and stained with Masson's Trichrome to confirm severe fibrosis.

Figure S1

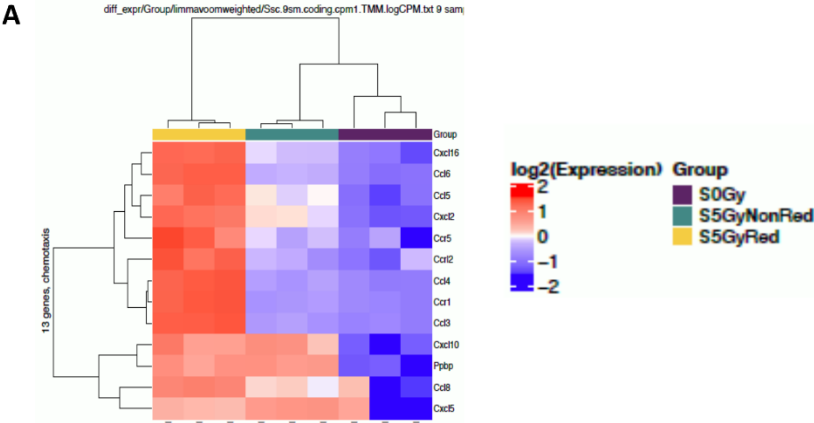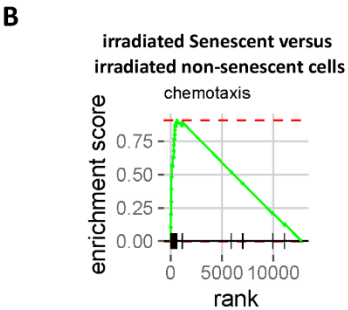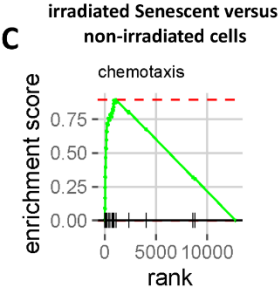

Figure S2

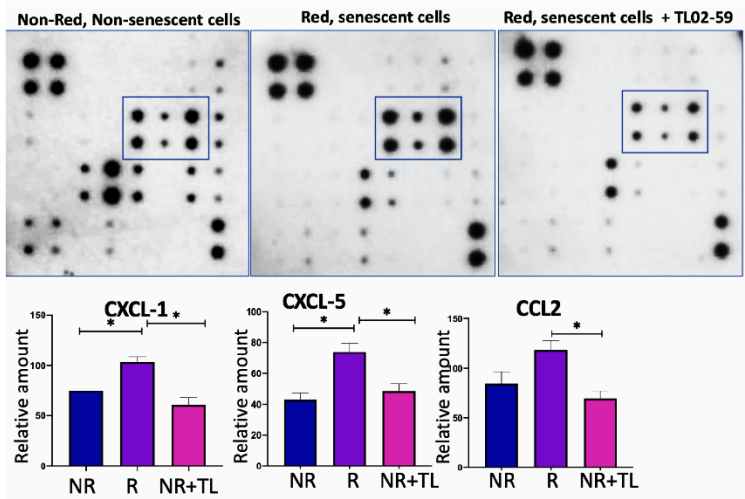

**Figure S3**

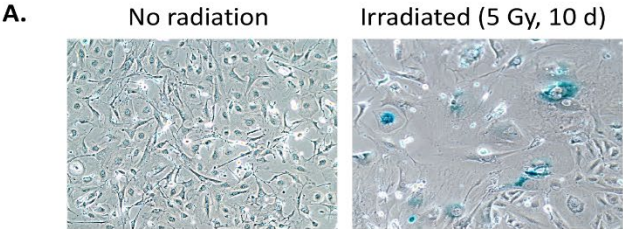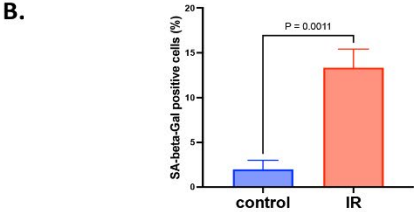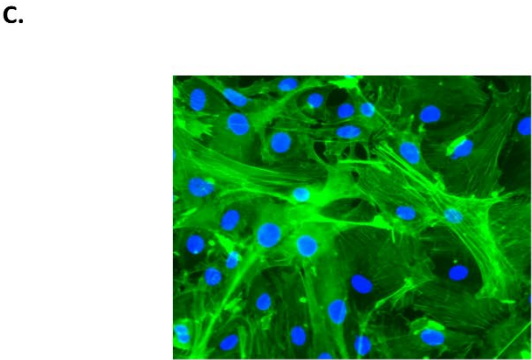

**Figure S4**

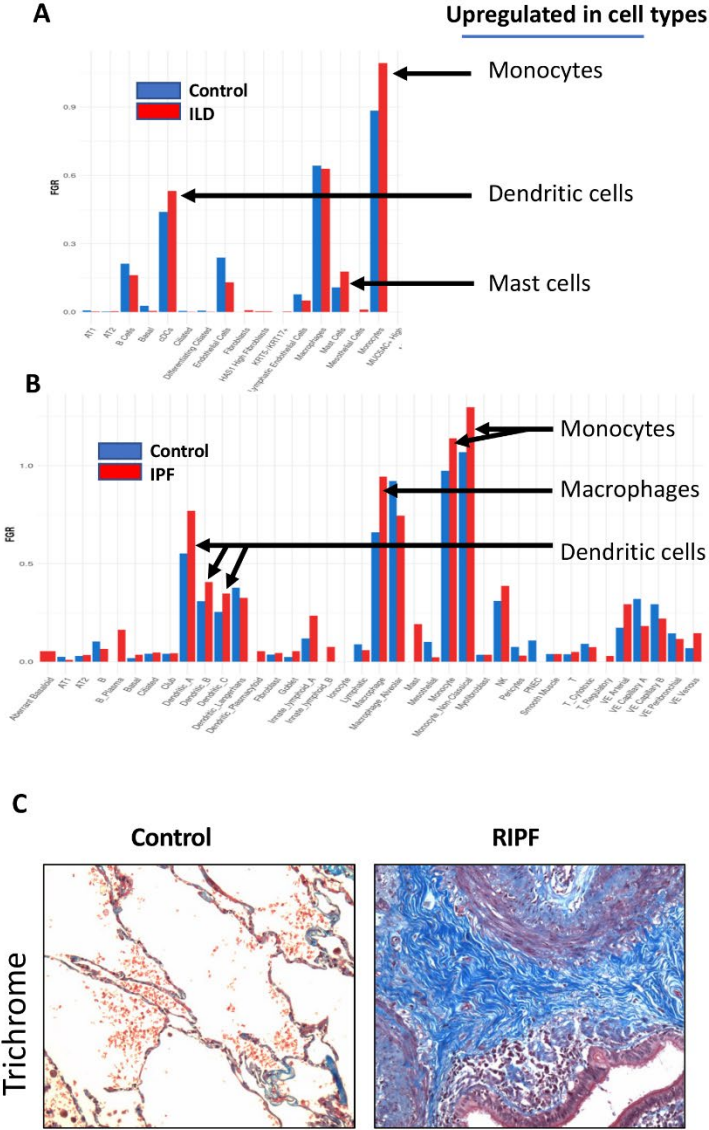

Supplement: 41420_2023_1538_MOESM1_ESM.pdf [file 41420_2023_1538_MOESM1_ESM.pdf]
